# Supplementary material for: Characterization of RNA editing gene APOBEC3C as a candidate tumor suppressor in prostate cancer
Source: Research Square preprint supplement (doi:10.21203/rs.3.rs-5610297/v1), 2025-04-10
Supplement: Supplementary file 1 [file 2b21514b13cf8c0a20995729.docx]

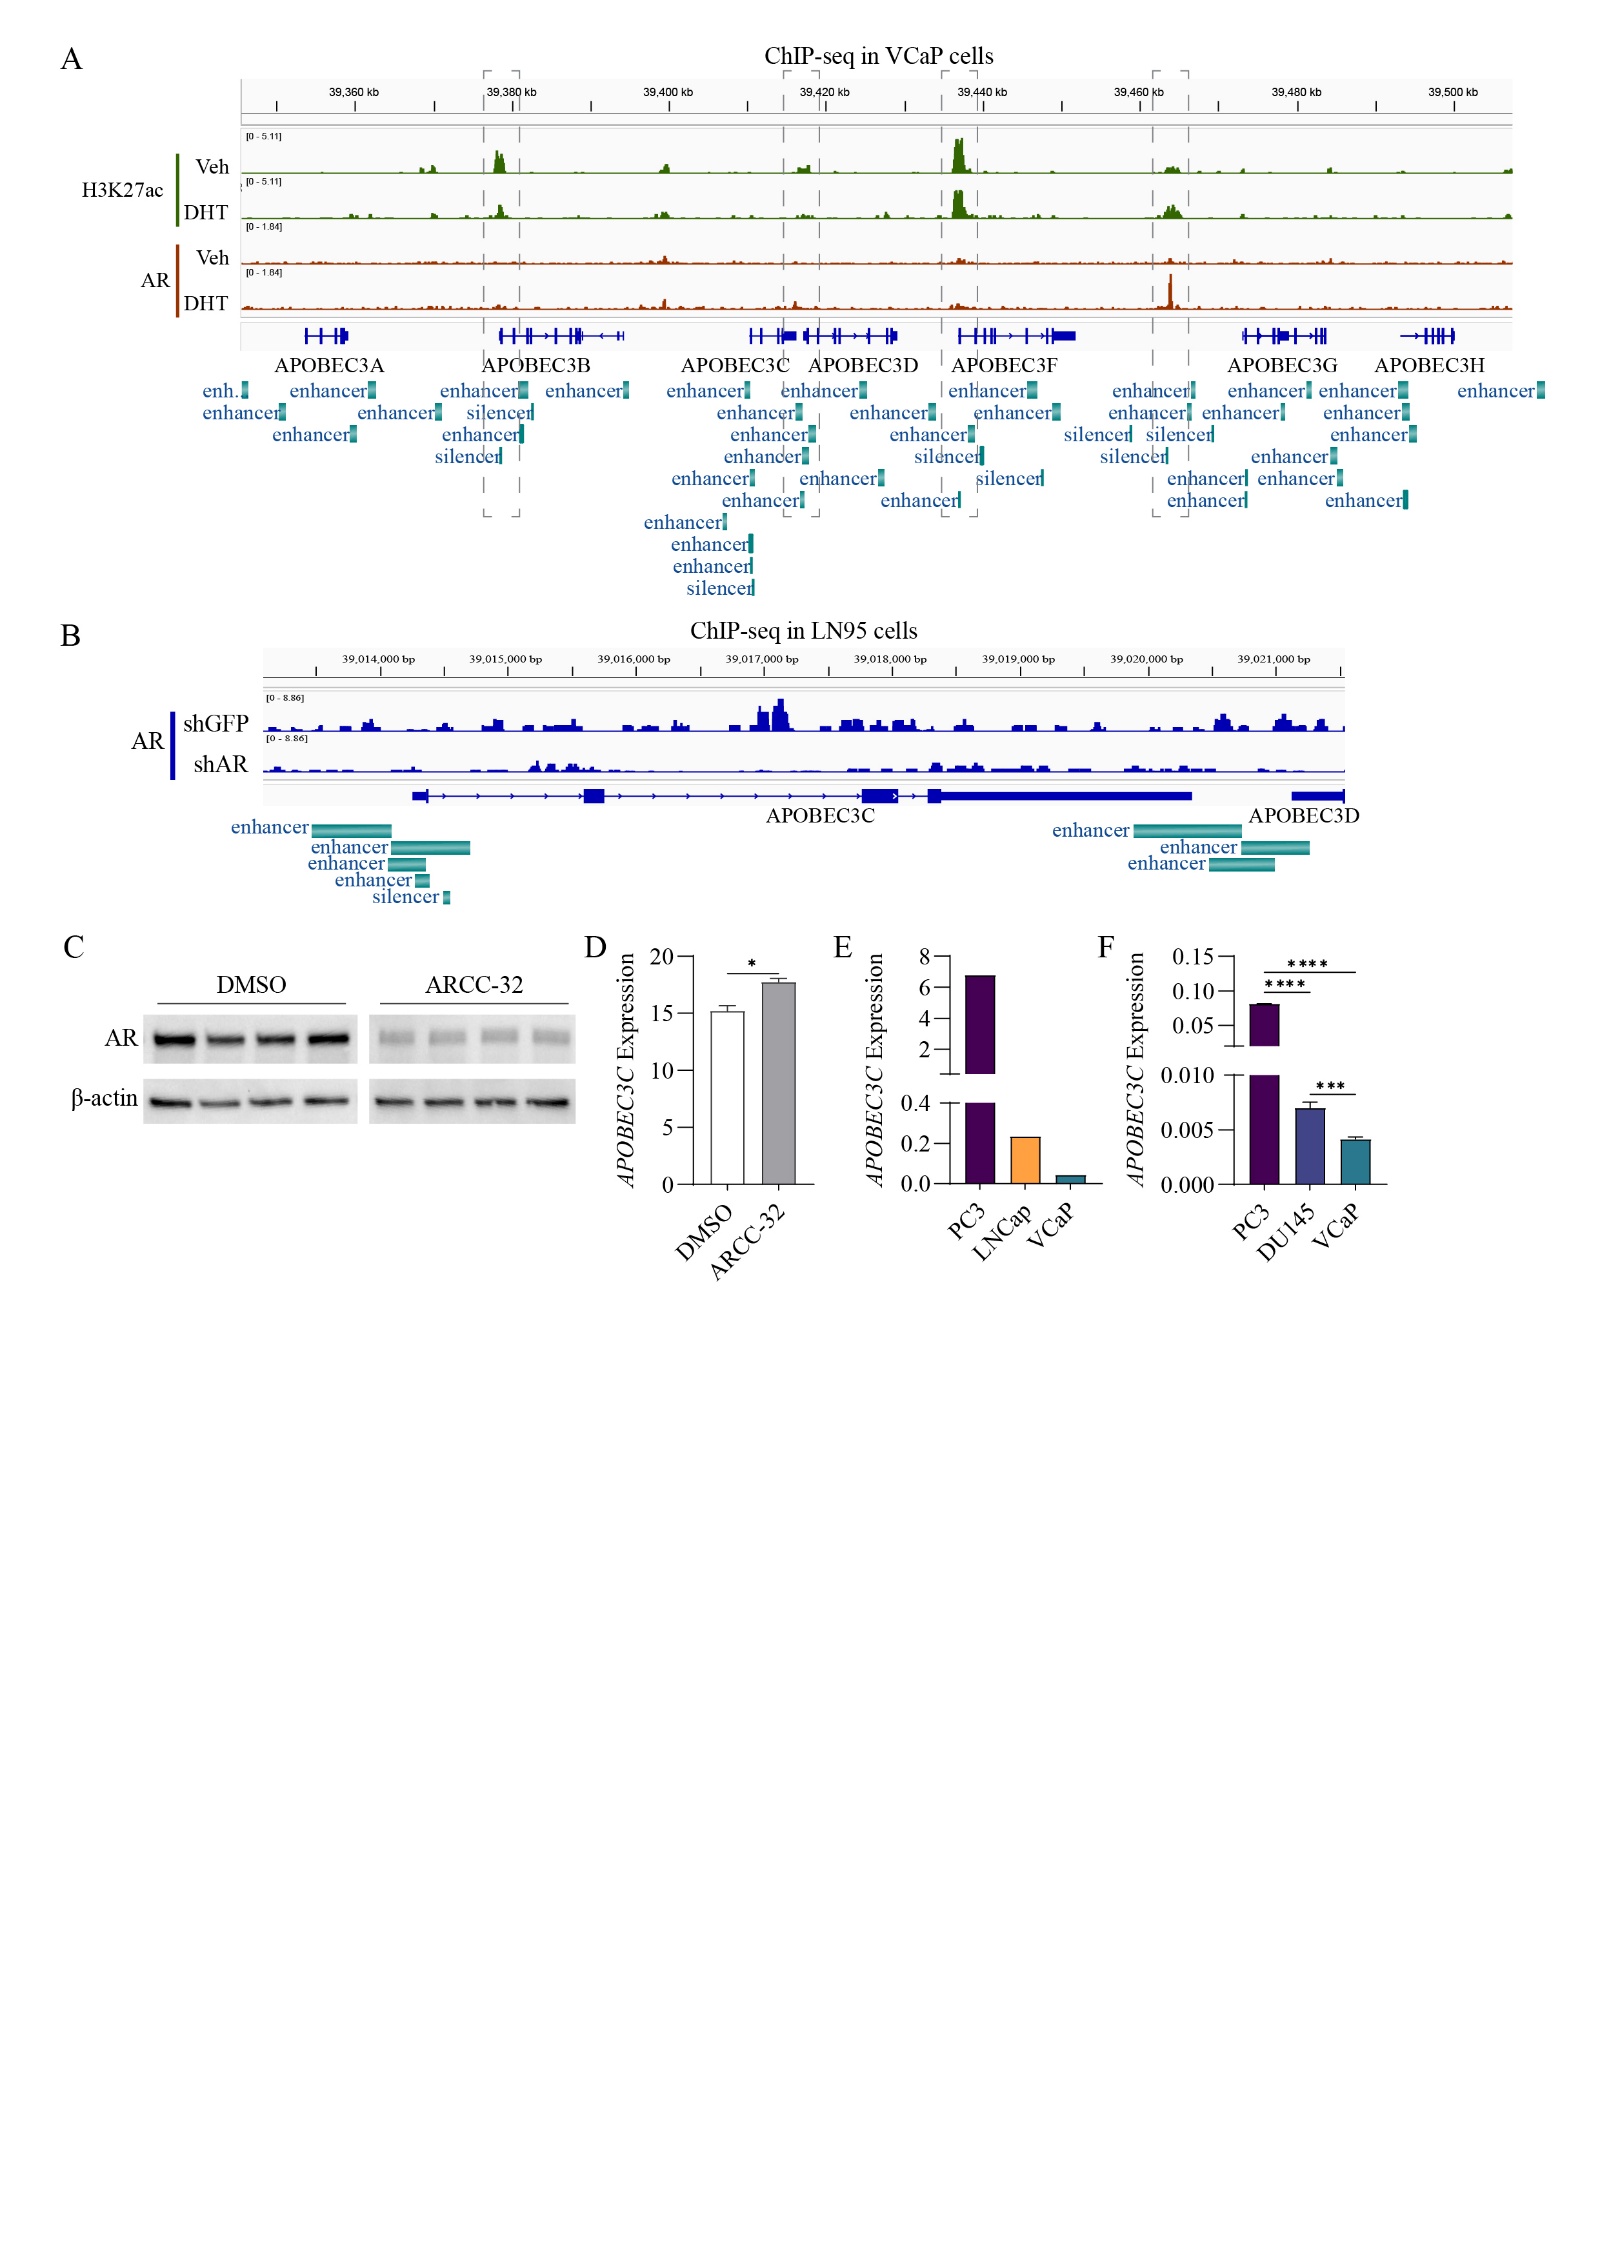


**Figure S1. AR-mediated regulation of the APOBEC3 family genes in PCa. A**, Track visualization of H3K27ac, AR and CTCF ChIP-seq peaks in the whole APOBEC3 family member gene loci in VCaP cells, upon treatment with vehicle control (Veh) versus DHT. **B**, Track visualization of AR ChIP-seq peaks in the APOBEC3C gene locus in LN95 PCa cell line, upon knockdown with shAR in comparison to shGFP control. The ChIP-seq analyses were based on GSE106559. **C**, Western blotting assay on AR proteins in LN95 cells, upon treatment with the AR degrader (ARD, ARCC-32) versus DMSO control. The individual lanes in each group represent biological replicates. **D**, APOBEC3C RNA expression in the LN95 cells exposed to the same treatments as described in C. (E) Computational analysis of APOBEC3C transcript levels in AR-heterogeneous cell lines (PC3: AR-null, LNCaP: AR-sensitive, VCaP: CRPC-derived AR-active) through the DepMap portal. (F) Experimental validation of APOBEC3C mRNA expression by RT-PCR in metastatic PCa models with distinct AR signaling contexts (PC3: AR-null, DU145: AR-low, and VCaP: CRPC-derived AR-active). * denotes p < 0.05, *** denotes p < 0.001, **** denotes p < 0.0001.


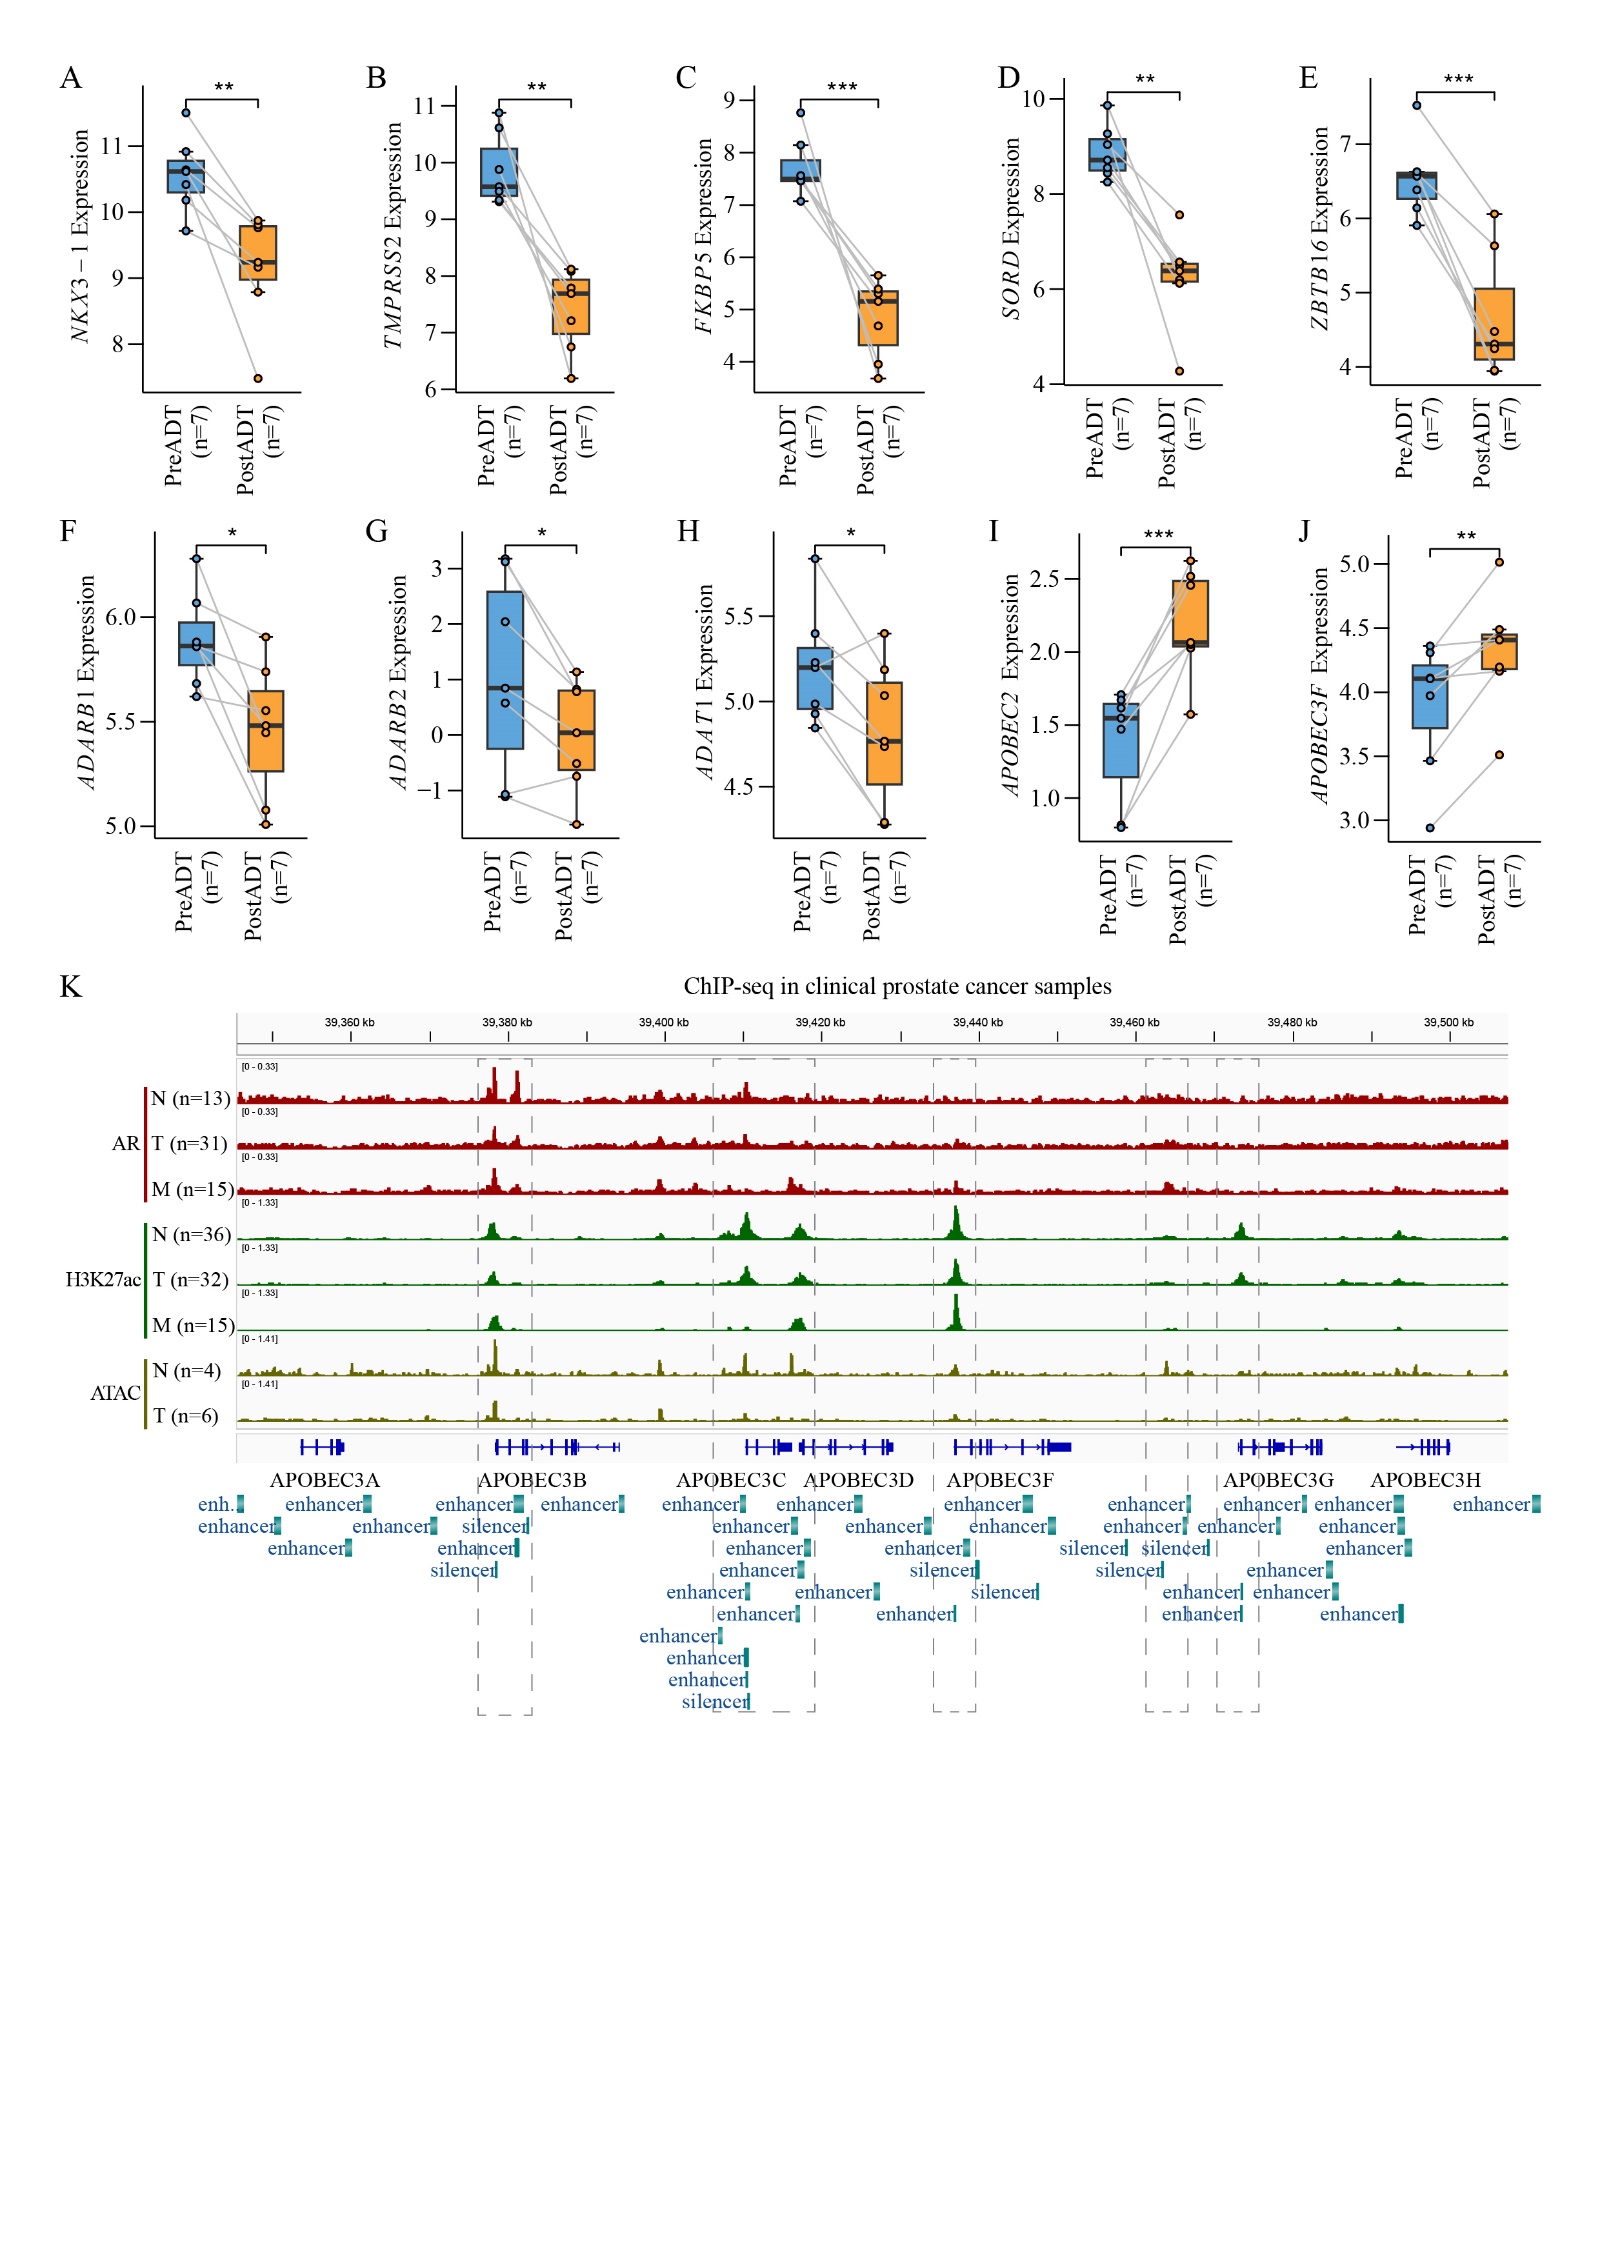


**Figure S2. AR-mediated regulation of RNA-editing genes in clinical PCa datasets. A-E**, The expression profiles of AR-signature genes (NKX3-1, TMPRSS2, FKBP5, SORD and ZBTB16) in each individual PCa patients, before and after the androgen deprivation therapy (ADT). **F-J**, The expression profiles of RNA-editing genes (ADARB1, ADARB2, ADAT1, APOBEC2, and APOBEC3F) in the same PCa cohorts as described. * denotes p < 0.05, ** denotes p < 0.01, *** denotes p < 0.001, and - denotes no significant difference. **K**, Track visualization of AR and H3K27ac ChIP-Seq and ATAC-seq peaks in the whole APOBEC3 family gene loci in clinical prostate cancer samples. N: normal control, T: primary PCa tumor, M: metastatic CRPC (M).


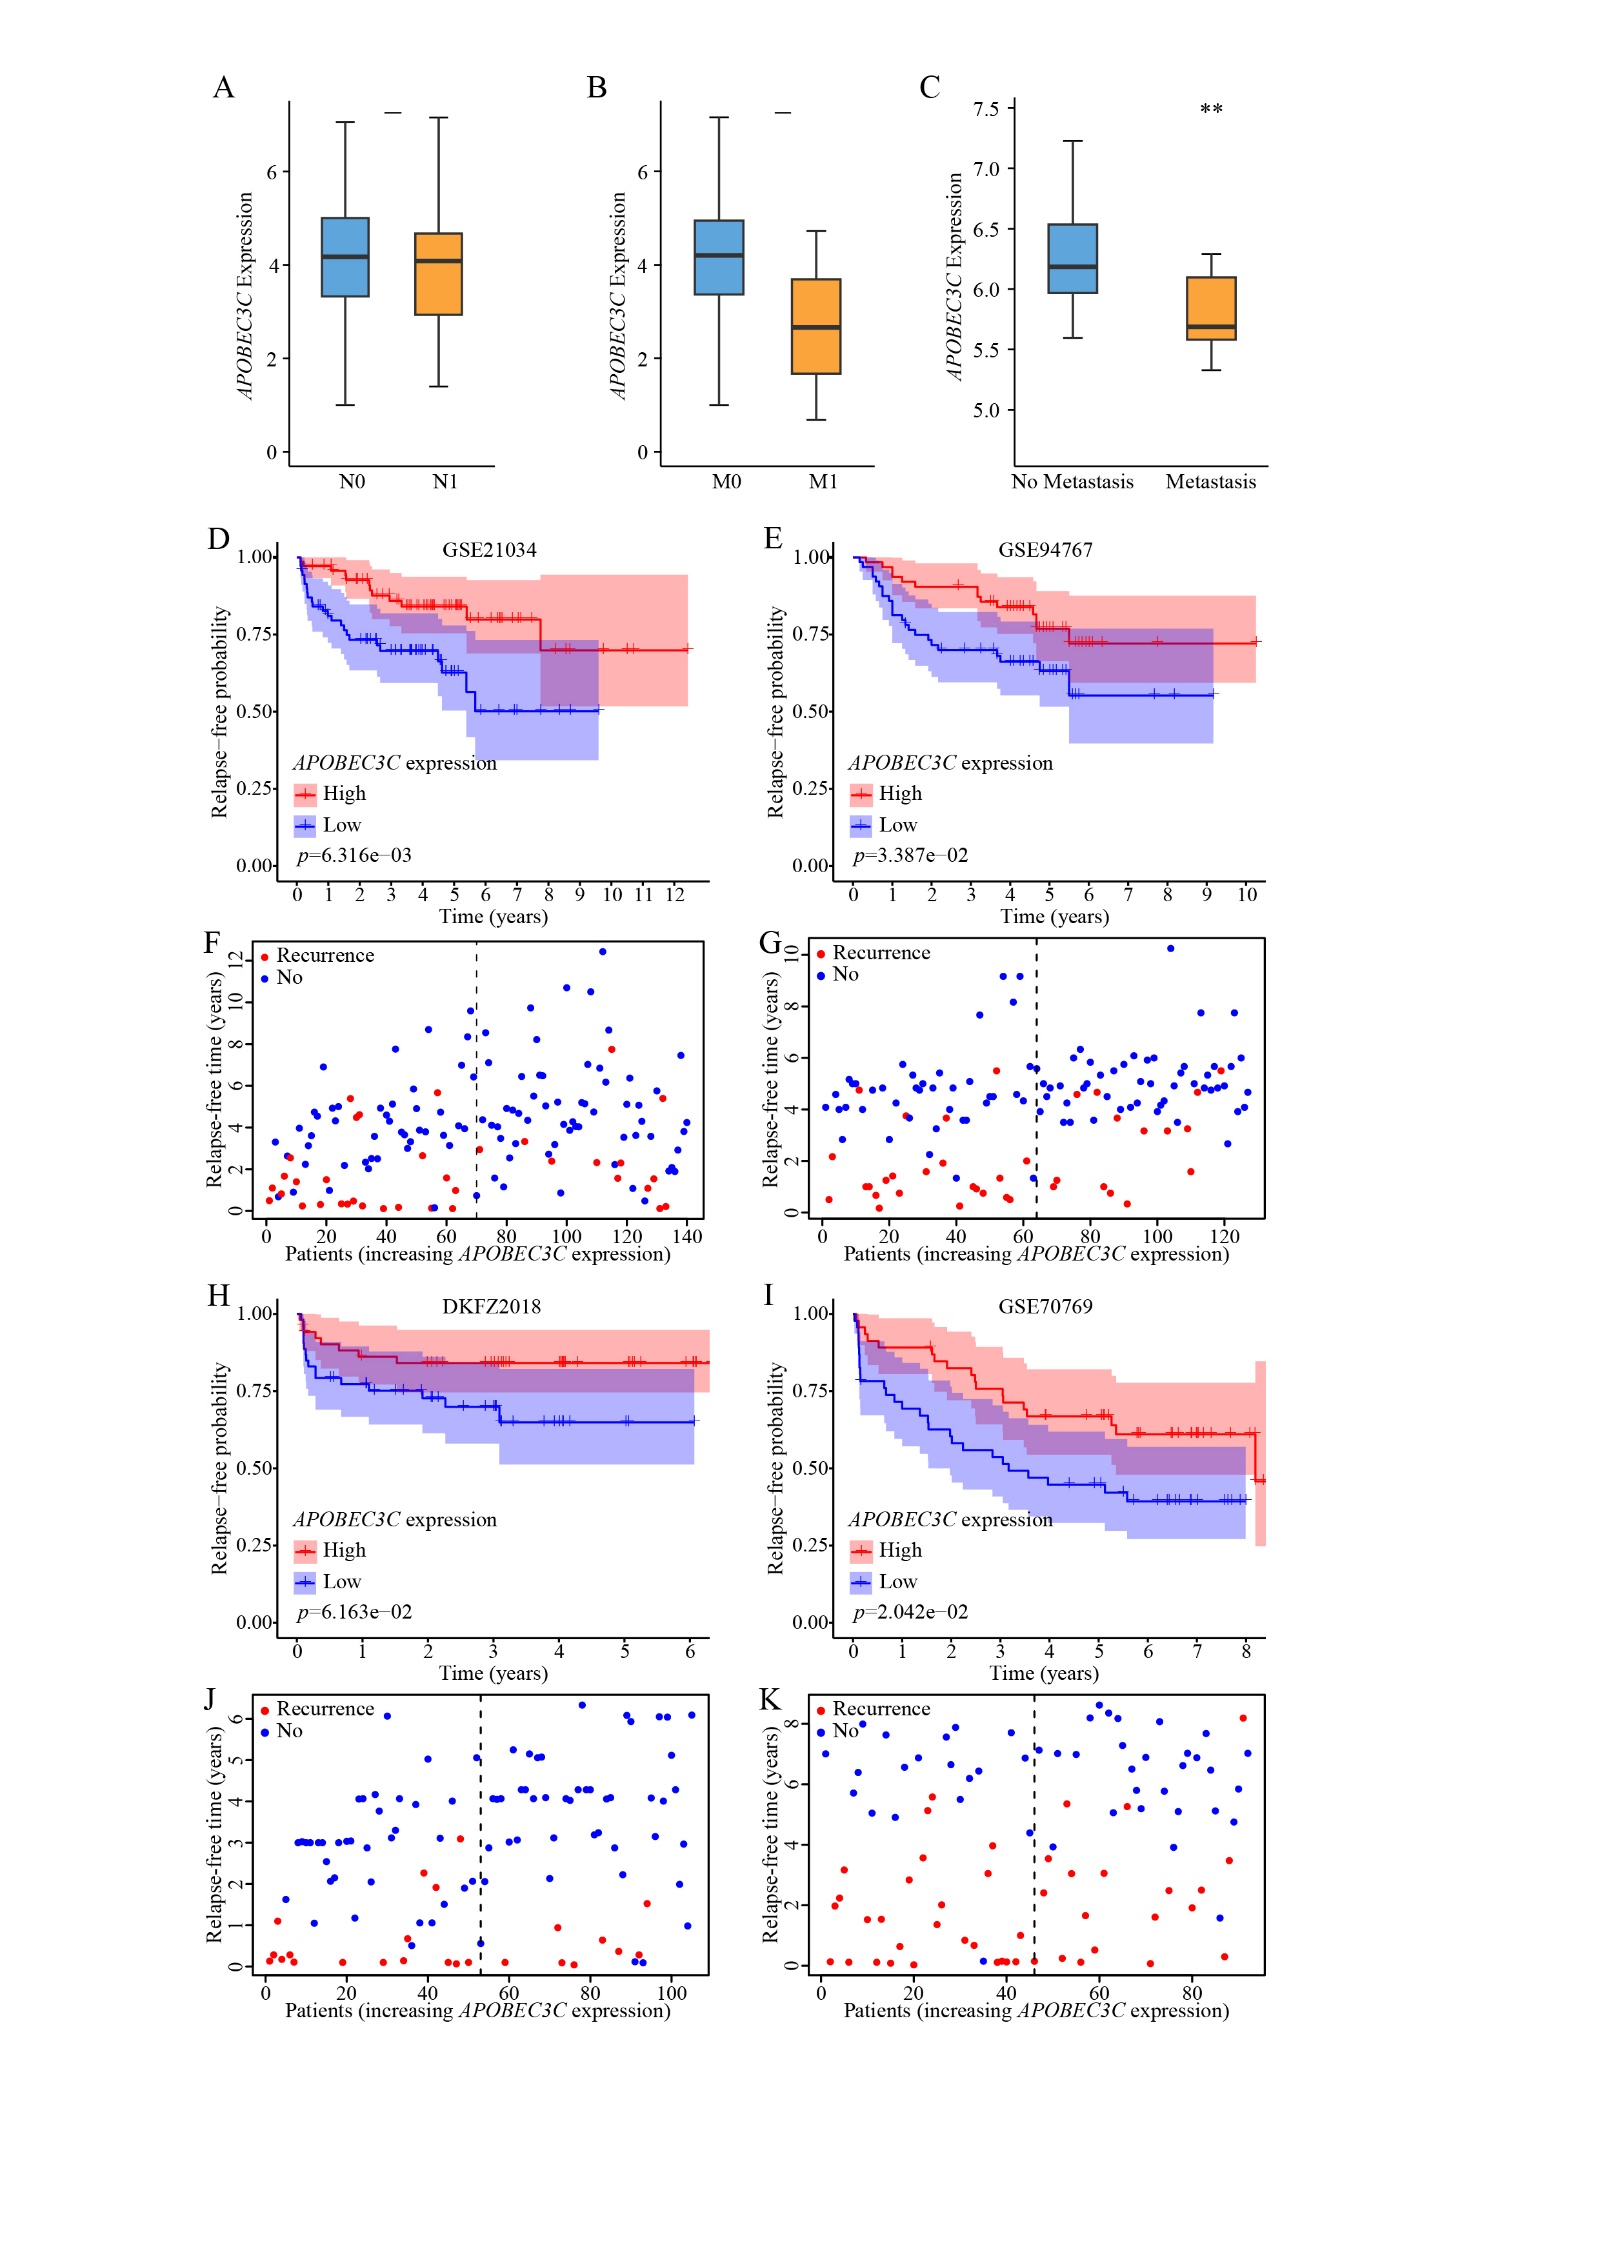


**Figure S3. Validation of clinicopathological and prognostic significance of APOBEC3C in PCa datasets. A-B**, The expression profiles of APOBEC3C in primary PCa (TCGA datasets), classified by pathological N stage (A) and M stage (B). **C**, Theexpression of APOBEC3C in PCa patients stratified based on their metastasis status, as derived from GSE41408 (No metastasis, n=39; Metastasis, n=9). **D-K**, Kaplan-Meier analysis of relapse-free survival probability in PCa cohorts that were categorized into APOBEC3C high versus low expression groups. The algorithms were based on GSE21034 (D, n = 140), GSE94767 (E, n = 127), DKFZ2018 (H, n = 105) and GSE70769 (I, n = 92) datasets, respectively. The plots on PCa risk distribution and recurrence status based on the GSE21034 (F), GSE94767 (G), DKFZ2018 (J) and GSE70769 (K) datasets, respectively.
