# Supplementary material for: Characterization of RNA editing gene APOBEC3C as a candidate tumor suppressor in prostate cancer
Source: Research Square preprint supplement (doi:10.21203/rs.3.rs-5610297/v1), 2025-04-10

The Figure S1-C that we utilized is presented as follows (specifically, we selected four lanes (boxes) for inclusion in the paper):

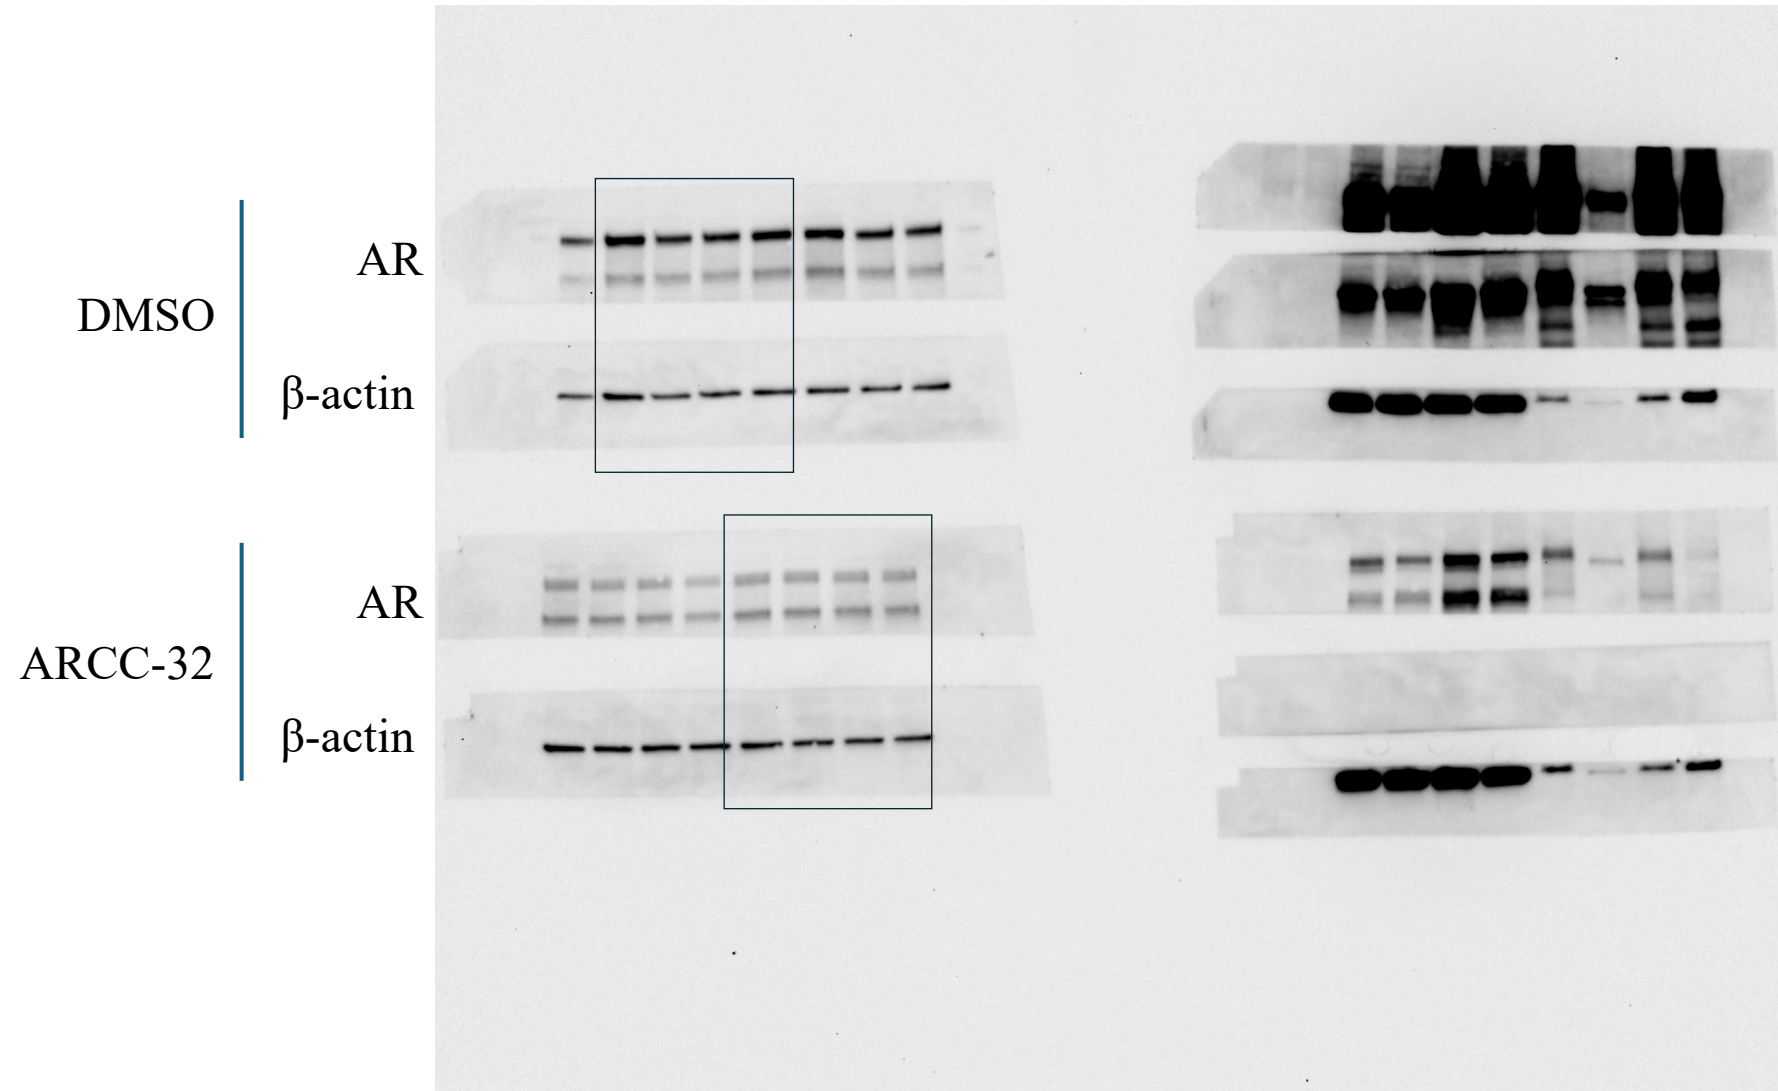

Western Results of other exposure times

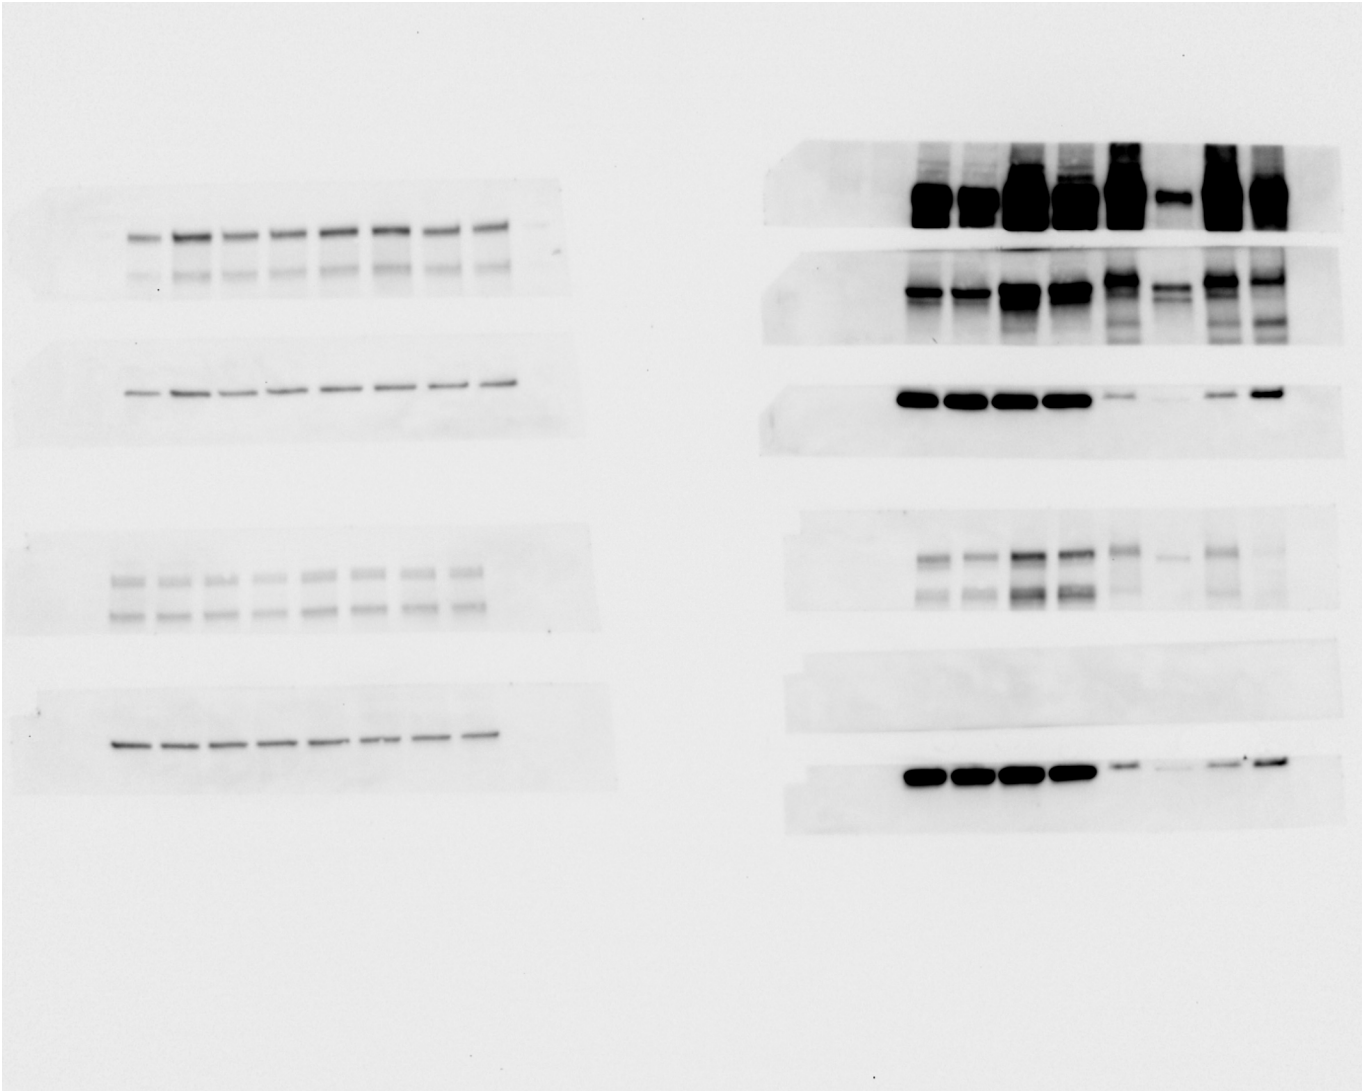

Western Results of other exposure times

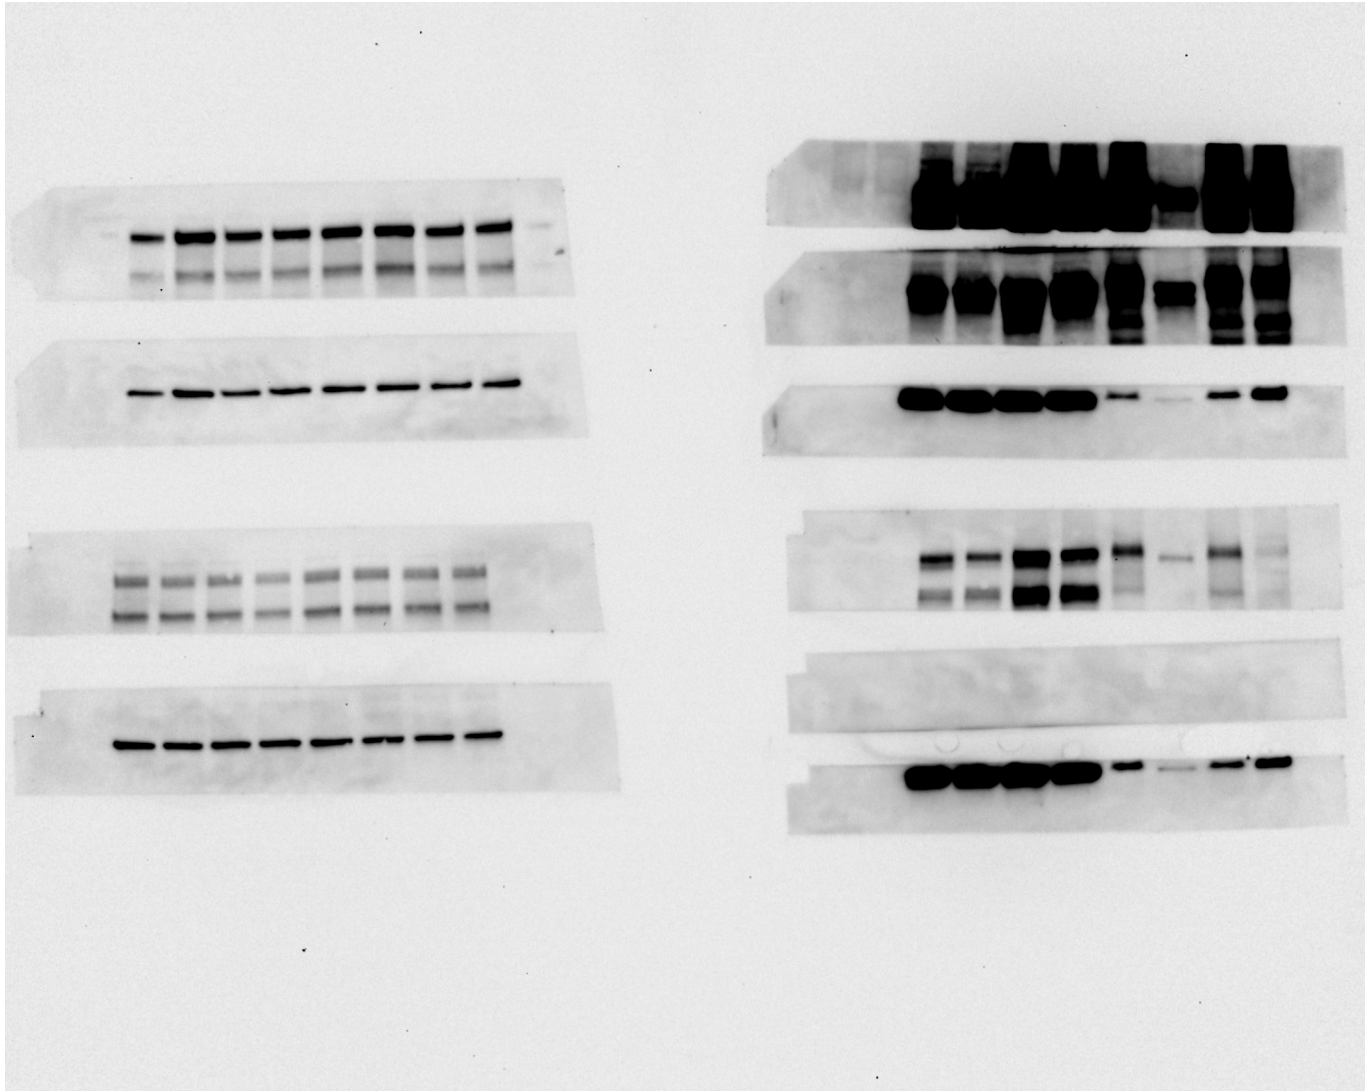

Supplement: Supplementary file 1 [file 58d9c5f11065f2261a7cabdf.pdf]
